# Supplementary material for: Areas of endemism of land planarians (Platyhelminthes: Tricladida) in the Southern Atlantic Forest
Source: PLoS One. 2020 Jul 20;15(7):e0235949. doi: 10.1371/journal.pone.0235949 (PMC7371199; doi:10.1371/journal.pone.0235949)
Supplement: S2 Material — (XYD) [file pone.0235949.s013.xyd]

nocommas
spp 274

xydata


sp 0 [Cratera arucuia]
-24.2693 -48.4054

sp 1 [Imbira flavonigra]
-29.501444 -50.221056

sp 2 [Pasipha quirogai]
-27.27944 -55.57861

sp 3 [Imbira negrita]
-27.14889 -53.898333

sp 4 [Luteostriata ceciliae]
-29.428944 -50.392000
-29.179104 -50.080631

sp 5 [Obama marmorata]
-27.84278 -48.92583
-27.84278 -48.92583
-27.95869 -48.76164
-27.05386 -49.08606
-28.235882 -49.498872
-26.743720 -49.175644
-27.05386 -49.08606

sp 6 [Luteostriata muelleri]
-26.80 -48.65
-26.85 -48.69
-26.88 -48.66
-27.84278 -48.92583
-27.05306 -49.08528
-27.840735 -48.924866
-26.743720 -49.175644
-27.111325 -48.895427
-27.05386 -49.08606

sp 7 [Luteostriata abundans]
-29.44 -51.68
-29.442428 -51.502151
-29.47 -51.42
-29.659801 -50.779542
-29.67 -51.06
-29.72 -51.12
-29.88 -50.79
-30.345738 -51.027817
-30.31 -51.32
-29.62940 -50.83110
-29.78828 -51.15084
-29.764171 -51.155840

sp 8 [Geoplana carrierei sensu Marcus, 1951]
-29.764171 -51.155840
-23.561966 -46.656958
-23.773397 -46.333248

sp 9 [Obama ladislavii]
-27.84278 -48.92583
-29.688889 -51.466944
-29.442428 -51.502151
-30.345738 -51.027817
-29.428944 -50.392000
-29.179104 -50.080631
-29.672918 -53.668858
-27.840735 -48.924866
-27.61727 -49.35075
-28.038956 -49.614243
-29.764171 -51.155840
-27.05386 -49.08606
-29.659801 -50.779542

sp 10 [Xerapoa pseudorhynchodemus]
-27.05306 -49.08528
-25.469604 -48.813739
-27.840735 -48.924866
-27.05386 -49.08606
-23.500212 -46.702310
-22.439089 -42.994351

sp 11 [Geoplana quagga]
-22.439089 -42.994351
-27.05386 -49.08606
-23.577633 -46.701739

sp 12 [Pasipha tapetilla]
-23.46047 -46.63672
-22.500057 -42.997365
-22.975852 -43.292230
-23.423381 -45.083399
-27.05306 -49.08528
-27.94 -48.79
-26.957485 -48.756133
-27.05386 -49.08606
-22.007522 -47.459448

sp 13 [Pasipha velina]
-27.05386 -49.08606
-27.111325 -48.895427

sp 14 [Obama apeva]
-27.840735 -48.924866
-27.61727 -49.35075
-27.05386 -49.08606
-27.111325 -48.895427

sp 15 [Obama assu]
-26.743720 -49.175644
-27.05386 -49.08606

sp 16 [Luteostriata fita]
-27.05386 -49.08606

sp 17 [Paraba gaucha]
-29.764171 -51.155840
-30.345738 -51.027817
-29.436817 -51.527611

sp 18 [Obama glieschi]
-27.242571 -53.272863

sp 19 [Pasipha hauseri]
-29.436817 -51.527611
-29.764171 -51.155840

sp 20 [Cephaloflexa nataliae]
-27.05386 -49.08606

sp 21 [Paraba suva]
-27.05386 -49.08606

sp 22 [Luteostriata itoides sp n]
-25.71 -48.62

sp 23 [Notogynaphallia atra]
-25.834333 -49.904062
-26.743720 -49.175644
-26.957485 -48.756133
-27.111325 -48.895427
-29.659801 -50.779542
-27.05386 -49.08606

sp 24 [Geoplana nigra]
-29.659801 -50.779542

sp 25 [Cephaloflexa bergi]
-22.72583 -44.62611
-19.8781 -40.5385 
-19.8875 -40.5362
-19.9123 -40.5362
-21.8735 -41.9142
-21.8768 -41.9228
-22.4558 -42.9963
-22.8039 -45.7768
-23.4300 -46.6333
-23.6527 -45.8909 
-24.2749 -48.4162
-27.8417 -48.9254
-27.9568 -48.7735
-29.179104 -50.080631
-23.75203 -45.631027
-27.04836 -49.09206
-25.469604 -48.813739
-24.269387 -48.405467
-27.84 -48.92
-27.9813889 -48.748055555
-25.469604 -48.813739
-28.041154 -49.615693
-27.959870 -49.482576
-23.423381 -45.083399
-25.483460 -48.832020
-25.548339 -49.313845
-27.05386 -49.08606

sp 26 [Obama burmeisteri]
-22.439089 -42.994351
-23.21 -46.95
-22.975852 -43.292230
-23.423381 -45.083399
-25.817820 -48.549932
-26.957485 -48.756133
-27.05386 -49.08606
-27.111325 -48.895427
-29.53 -51.07
-23.500212 -46.702310

sp 27 [Paraba multicolor]
-22.72583 -44.62611
-22.439089 -42.994351
-24.269387 -48.405467
-27.840735 -48.924866
-28.040421 -49.615316
-28.040421 -49.615316
-25.548339 -49.313845
-25.834333 -49.904062
-24.173828 -48.542533
-25.101490 -50.174131
-29.194212 -51.165792
-29.722778 -53.714177
-29.722778 -53.714177
-23.096206 -48.914060
-23.453148 -46.634488
-23.505856 -46.211903
-23.773397 -46.333248

sp 28 [Obama polyophthalma]
-25.71 -48.62
-25.817820 -48.549932
-26.743720 -49.175644
-26.28 -48.86
-27.05386 -49.08606
-29.659801 -50.779542

sp 29 [Obama carinata]
-24.26 -48.40
-24.269387 -48.405467
-25.483460 -48.832020
-25.548339 -49.313845
-21.934693 -47.372714
-23.741677 -46.886010
-24.317073 -47.639867
-23.453148 -46.634488
-23.505856 -46.211903
-24.085174 -46.640241
-24.498352 -48.103028
-23.701329 -46.39

sp 30 [Pasipha rosea]
-23.77368 -46.51469
-22.007522 -47.459448
-23.453148 -46.634488
-25.834333 -49.904062
-21.471847 -47.573321
-22.78222 -44.60583


sp 31 [Cratera joia]
-25.483460 -48.832020

sp 32 [Notogynaphallia mourei]
-25.483460 -48.832020
-25.548339 -49.313845

sp 33 [Notogynaphallia plumbea]
-24.27638 -48.41556
-25.469604 -48.813739
-24.269387 -48.405467
-27.9813889 -48.748055555
-23.459300 -46.755164
-25.483460 -48.832020

sp 34 [Geoplana pulchella]
-27.61695 -49.34778
-27.98139 -48.74806
-27.05386 -49.08606

sp 35 [Pasipha splendida]
-22.439089 -42.994351

sp 36 [Pasipha oliverioi]
-22.439089 -42.994351

sp 37 [Geoplana fragai]
-22.439089 -42.994351

sp 38 [Geoplana jandira]
-22.439089 -42.994351

sp 39 [Obama braunsi]
-22.682420 -46.732935
-23.459300 -46.755164
-23.87 -46.32
-23.505856 -46.211903

sp 40 [Paraba caapora]
-27.05386 -49.08606
-24.518261 -48.844379

sp 41 [Obama poca]
-24.148182 -46.830256

sp 42 [Obama schubarti]
-23.459300 -46.755164
-24.148182 -46.830256

sp 43 [Paraba tapira]
-24.269387 -48.405467
-23.964151 -47.512885

sp 44 [Geoplana toriba]
-24.317073 -47.639867

sp 45 [Issoca potyra]
-24.269387 -48.405467
-24.498352 -48.103028

sp 46 [Obama ficki]
-29.198086 -50.026672
-29.428944 -50.392000
-29.442428 -51.502151
-28.235930 -49.498947

sp 47 [Obama pintada]
-28.156986 -49.637516

sp 48 [Cratera nigrimarginata urubici]
-28.162100 -49.626466

sp 49 [Paraba preta]
-22.439089 -42.994351

sp 50 [Geobia subterranea]
-29.764171 -51.155840
-23.448030 -46.666767
-25.71 -48.62
-23.096206 -48.914060
-23.505856 -46.211903
-22.439089 -42.994351
-27.05386 -49.08606

sp 51 [Choeradoplana marthae]
-23.63 -45.86
-24.085174 -46.640241

sp 52 [Choeradoplana catua]
-22.439089 -42.994351

sp 53 [Issoca rezendei]
-23.423381 -45.083399
-24.085174 -46.640241
-24.148182 -46.830256
-26.957485 -48.756133
-27.05386 -49.08606
-25.469604 -48.813739
-23.578104 -46.689043
-22.500057 -42.997365

sp 54 [Issoca jandaia]
-22.78222 -44.60583
-23.459736 -46.761403
-24.269387 -48.405467

sp 55 [Issoca piranga]
-22.439089 -42.994351

sp 56 [Xerapoa hystrix]
-23.453148 -46.634488
-23.505856 -46.211903
-25.548339 -49.313845

sp 57 [Xerapoa una]
-27.111325 -48.895427

sp 58 [Obama applanata]
-22.439089 -42.994351

sp 59 [Notogynaphallia sexstriata]
-23.56671 -46.73017
-27.04836 -49.09200
-22.439089 -42.994351
-27.111325 -48.895427
-29.659801 -50.779542
-27.05306 -49.08528
-25.469604 -48.813739

sp 60 [Paraba goettei]
-22.439089 -42.994351

sp 61 [Pasipha plana]
-22.439089 -42.994351

sp 62 [Cratera pseudovaginuloides]
-22.439089 -42.994351

sp 63 [Luteostriata caissara]
-23.701329 -46.39
-24.148182 -46.830256
-22.439089 -42.994351
-22.500057 -42.997365
-22.975852 -43.292230
-23.423381 -45.083399

sp 64 [Paraba cassula]
-22.439089 -42.994351

sp 65 [Matuxia matuta]
-21.87 -41.91
-22.439089 -42.994351

sp 66 [Cratera tamoia]
-22.46447 -43.00278
-22.439089 -42.994351
-22.500057 -42.997365

sp 67 [Obama trigueira]
-22.439089 -42.994351
-22.500057 -42.997365

sp 68 [Cratera yara]
-22.439089 -42.994351

sp 69 [Pasipha não pinima morretes]
-25.469604 -48.813739

sp 70 [Rhynchodemus hectori]
-22.439089 -42.994351

sp 71 [Barreira barreirana]
-22.975852 -43.292230
-23.423381 -45.083399
-22.500057 -42.997365

sp 72 [Barreira zebroides]
-22.500057 -42.997365

sp 73 [Cratera taxiarcha]
-23.453148 -46.634488

sp 74 [Pasipha cafusa]
-23.423381 -45.083399

sp 75 [Geoplana picta]
-23.423381 -45.083399

sp 76 [Rhynchodemus scius]
-23.423381 -45.083399

sp 77 [Pasipha chimbeva]
-23.459736 -46.761403

sp 78 [Geoplana chiuna]
-22.007522 -47.459448

sp 79 [Cratera crioula]
-23.453148 -46.634488

sp 80 [Obama livia]
-23.453148 -46.634488
-23.459736 -46.761403

sp 81 [Notogynaphallia parca]
-23.453148 -46.634488

sp 82 [Pasipha pinima]
-22.45528 -42.99750
-25.46972 -48.81222
-23.453148 -46.634488
-24.269387 -48.405467
-28.041154 -49.615693

sp 83 [Geoplana regia]
-21.779764 -48.161178

sp 84 [Matuxia tuxaua]
-22.45528 -42.99750
-23.453148 -46.634488
-23.459736 -46.761403

sp 85 [Geoplana ferussaci sensu Riester, 1938]
-23.500212 -46.702310
-20.02 -43.91
-22.500057 -42.997365

sp 86 [Obama metzi]
-23.500212 -46.702310
-23.701329 -46.39

sp 87 [Imbira marcusi]
-22.72583 -44.62611
-24.269387 -48.405467
-25.469604 -48.813739
-23.500212 -46.702310
-23.505856 -46.211903
-24.085174 -46.640241

sp 88 [Pasipha astraea]
-23.500212 -46.702310

sp 89 [Obama divae]
-24.269387 -48.405467
-23.773397 -46.333248

sp 90 [Geoplana duca]
-23.453148 -46.634488
-23.505856 -46.211903

sp 91 [Obama evelinae]
-23.773397 -46.333248
-24.085174 -46.640241

sp 92 [Cratera hina]
-23.773397 -46.333248

sp 93 [Pasipha pasipha]
-23.453148 -46.634488

sp 94 [Geoplana pavani]
-23.505856 -46.211903

sp 95 [Paraba phocaica]
-23.500212 -46.702310

sp 96 [Xerapoa trina]
-22.38455 -42.97681
-22.45528 -42.99750
-23.773397 -46.333248

sp 97 [Choeradoplana bilix]
-22.946008 -44.474647

sp 98 [Obama carbayoi]
-27.247305 -53.893789

sp 99 [Obama baptistae]
-29.722778 -53.714177

sp 100 [Pasipha mesoxantha]
-29.722778 -53.714177

sp 101 [Pasipha turvensis]
-27.247305 -53.893789

sp 102 [Luteostriata ernesti]
-22.007522 -47.459448
-23.505856 -46.211903
-23.75 -47.19
-27.94 -48.79
-22.96 -46.98
-23.21 -46.95
-23.453148 -46.634488
-23.701329 -46.39
-25.548339 -49.313845
-29.428944 -50.392000

sp 103 [Obama josefi]
-29.179104 -50.080631
-29.428944 -50.392000
-29.179104 -50.080631
-29.480590 -50.174679

sp 104 [Luteostriata graffi]
-27.468485 -48.377724
-29.428944 -50.392000
-29.179104 -50.080631
-29.53 -51.07
-29.62940 -50.83110
-29.442428 -51.502151
-29.49 -50.82
-29.659801 -50.779542
-29.480590 -50.174679

sp 105 [Supramontana irritata]
-29.428944 -50.392000

sp 106 [Paraba rubidolineata]
-29.428944 -50.392000
-27.247305 -53.893789
-27.840735 -48.924866

sp 107 [Paraba franciscana]
-29.179104 -50.080631
-29.428944 -50.392000
-29.480590 -50.174679

sp 108 [Luteostriata arturi]
-29.179104 -50.080631
-29.428944 -50.392000

sp 109 [Pasipha backesi]
-29.428944 -50.392000

sp 110 [Pasipha brevilineata]
-29.428944 -50.392000

sp 111 [Luteostriata pseudoceciliae]
-29.428944 -50.392000

sp 112 [Choeradoplana langi]
-27.111325 -48.895427
-27.05386 -49.08606

sp 113 [Cratera não notovesicularis linha sp n]
-25.469604 -48.813739

sp 114 [Obama catharina]
-26.23 -49.40

sp 115 [Cratera steffeni]
-29.179104 -50.080631

sp 116 [Cratera ochra]
-28.157565 -49.638002
-29.428944 -50.392000

sp 117 [Obama maculipunctata]
-29.198086 -50.026672
-29.428944 -50.392000

sp 118 [Cratera nigrimarginata]
-26.44 -51.31

sp 119 [Cratera cryptolineata]
-26.19 -50.33

sp 120 [Cratera aureomaculata]
-26.19 -50.33

sp 121 [Obama itatiayana]
-22.38 -44.68

sp 122 [Notogynaphallia octostriata]
-29.53 -51.07
-27.05386 -49.08606

sp 123 [Choeradoplana albonigra]
-19.90 -40.54
-21.90 -41.95
-22.439089 -42.994351

sp 124 [Pasipha biseminalis]
-22.439089 -42.994351

sp 125 [Cratera nao nigrimarginata morretes]
-25.469604 -48.813739

sp 126 [Pasipha caeruleonigra]
-22.439089 -42.994351

sp 127 [Geoplana goetschi]
-22.439089 -42.994351

sp 128 [Obama anthropophila morretes]
-25.469604 -48.813739

sp 129 [Pasipha velutina]
-20.02 -43.91

sp 130 [Geoplana incognita]
-22.439089 -42.994351

sp 131 [Obama eudoxiae]
-22.439089 -42.994351

sp 132 [Obama dictyonota]
-22.439089 -42.994351

sp 133 [Geoplana notophthalma]
-20.02 -43.91
-22.439089 -42.994351

sp 134 [Obama eudoximariae]
-22.500057 -42.997365

sp 135 [Obama riesteri]
-22.500057 -42.997365

sp 136 [Obama fryi]
-22.975852 -43.292230
-22.500057 -42.997365

sp 137 [Choeradoplana crassiphalla]
-26.132969 -53.716113

sp 138 [Cratera laranja sp n]
-24.269387 -48.405467

sp 139 [Cratera viridimaculata]
-26.132969 -53.716113

sp 140 [Supramontana argentina]
-25.638105 -54.324086
-26.132969 -53.716113

sp 141 [Pasipha atla]
-26.132969 -53.716113

sp 142 [Pasipha johnsoni]
-26.132969 -53.716113

sp 143 [Pasipha mbya]
-25.717567 -54.59656
-26.132969 -53.716113

sp 144 [Choeradoplana banga]
-23.45 -46.63
-22.70 -45.52

sp 145 [Choeradoplana benyai]
-29.42 -50.39
-27.86 -48.91

sp 146 [Choeradoplana bocaina]
-22.75 -44.62

sp 147 [Choeradoplana gladismariae]
-24.26 -48.40

sp 148 [Obama otavioi]
-23.77637 -46.31195

sp 149 [Cratera cuarassu]
-21.87 -41.91

sp 150 [Cratera anamariae]
-22.500057 -42.997365

sp 151 [Paraba piriana]
-22.45528 -42.99750

sp 152 [Paraba tingauna]
-27.865111 -48.919389
-27.94944 -48.79556

sp 153 [Cephaloflexa araucariana]
-29.42736 -50.39838

sp 154 [Cratera picuia]
-25.76437 -48.62266

sp 155 [Imbira guaiana]
-29.442428 -51.502151
-28.039273 -49.614560
-29.41666 -50.38333

sp 156 [Choeradoplana spatulata]
-27.04836 -49.09200

sp 157 [Rhynchodemus blainvillei]
-27.04836 -49.09200

sp 158 [Anisorhynchodemus pellucidus]
-27.04836 -49.09200

sp 159 [Choeradoplana ehrenreichi]
-26.28 -48.86

sp 160 [Obama argus]
-22.26 -42.56

sp 161 [Choeradoplana iheringi]
-29.427361 -50.398389
-29.63 -50.87
-29.659801 -50.779542

sp 162 [Choeradoplana pucupucu]
-22.439089 -42.994351
-22.74 -44.61
-23.701329 -46.39

sp 163 [Choeradoplana abaiba]
-27.84 -48.92
-27.947500 -48.751111
-27.961389 -48.758333

sp 164 [Choeradoplana agua]
-21.876667 -41.919722

sp 165 [Obama anthropophila]
-23.50 -46.54

sp 165 [Obama anthropophila]
-27.05386 -49.08606
-27.84 -48.92
-29.42964 -50.39783
-29.440556 -51.507778
-29.610000 -51.163611
-29.659801 -50.779542
-29.69 -51.27
-29.72 -51.12
-24.26 -48.40
-27.84278 -48.92583 
-27.04836 -49.09206
-24.269387 -48.405467
-27.840735 -48.924866
-29.428944 -50.392000

sp 166 [Obama decidualis]
-29.74167 -53.84417

sp 167 [Obama nungara]
-27.84278 -48.92583 
-27.959777 -49.482612

sp 168 [Geoplana boraceia]
-23.75203 -45.631027
-23.75203 -45.631027

sp 169 [Geoplana chita]
-25.469604 -48.813739

sp 170 [Geoplana cambara]
-25.71 -48.62
-25.76437 -48.62266

sp 171 [Geoplana cananeia]
-25.091235 -47.928957

sp 172 [Geoplana caraguatatuba]
-23.594012 -45.429672

sp 173 [Geoplana ibiuna]
-23.449229 -47.012175
-23.93 -47.19

sp 174 [Geoplana iporanga]
-24.269387 -48.405467
-24.269387 -48.405467

sp 175 [Geoplana mogi]
-23.451536 -46.227993
-23.570942 -46.693776

sp 176 [Geoplana paranapiacaba]
-23.77746 -46.30145

sp 177 [Geoplana piratininga]
-23.490918 -46.516424

sp 178 [Geoplana vaginuloides]
-22.93707 -43.46098
-22.439089 -42.994351

sp 179 [Geoplana apua]
-22.71 -43.56

sp 180 [Issoca assanga]
-19.88740 -40.54319
-21.87694 -41.92583

sp 181 [Choeradoplana sp 1]
-24.269387 -48.405467

sp 182 [Geoplana UCS imaturo chita2]
-24.269387 -48.405467

sp 183 [Geoplaninae quasevaginuloides sp n]
-24.269387 -48.405467

sp 184 [Issoca UCS 3 estrias]
-24.269387 -48.405467

sp 185 [Luteostriata cf ernesti]
-24.269387 -48.405467

sp 186 [Obama ferussaci Graff]
-25.469604 -48.813739
-24.269387 -48.405467

sp 187 [Obama pseudotavioi]
-24.269387 -48.405467

sp 188 [Obama UCS tigresa]
-24.269387 -48.405467

sp 189 [Paraba magma sp n]
-24.269387 -48.405467

sp 190 [Paraba pseudophocaica]
-24.269387 -48.405467

sp 191 [Paraba UCS estria verde]
-24.269387 -48.405467

sp 192 [Pasipha pinima 2]
-24.269387 -48.405467
-27.840735 -48.924866
-27.994964 -48.759313 
-27.61727 -49.35075
-28.161997 -49.627107

sp 193 [Pasipha pseudoplana]
-29.428944 -50.392000
-24.269387 -48.405467

sp 194 [Xerapoa listrada]
-24.269387 -48.405467
-27.960057 -49.482761

sp 195 [Xerapoa preta]
-24.269387 -48.405467

sp 196 [Xerapoa trilistrada]
-29.43 -50.37

sp 197 [Choeradoplana ‘apuana’]
-29.436278 -50.373694

sp 198 [Imbira geobioides]
-29.436278 -50.373694

-27.94 -48.79sp 199 [Pasipha 149]
-29.427361 -50.398389

sp 200 [Rhynchodemus flona]
-29.42 -50.39

sp 201 [Paraba lactea sp n]
-29.427361 -50.398389

sp 202 [Geoplana ‘flamenco’]
-29.42 -50.39

sp 273 [Geoplana nao ‘flamenco’]
-28.038422 -49.613814

sp 203 [Geoplana palida]
-29.42 -50.39

sp 204 [Pasipha marronina]
-29.42 -50.39

sp 205 [Pasipha cinza FLONA]
-29.42 -50.39

sp 206 [Geoplana pseudopavani]
-29.42 -50.39

sp 207 [Choeradoplana minima]
-29.42 -50.39

sp 208 [Matuxia ‘100’]
-29.42 -50.39

sp 209 [Paraba ‘triste’]
-29.42 -50.39

sp 210 [Barreirana urubici]
-28.161702 -49.628062

sp 211 [Choeradoplana cabeça escura urubici]
-28.282715 -49.556282
-28.236262 -49.498931

sp 212 [Choeradoplana linha media urubici]
-28.162037 -49.627140

sp 213 [Choeradoplana suja urubici]
-28.038422 -49.613814

sp 214 [Choeradoplana pseudogladismariae]
-27.61727 -49.35075

sp 215 [Luteostriata graffi urubici]
-28.161771 -49.627752

sp 216 [Notogynaphallia sexstriata urubici]
-28.161876 -49.627519

sp 217 [Obama ficki lisa]
-28.140017 -49.629717

sp 218 [Obama magma-caramelo nos bordos]
-28.140421 -49.627143

sp 219 [Obama manchada]
-28.038786 -49.614039

sp 220 [Obama onca]
-28.235706 -49.498816

sp 221 [Obama pontas escuras]
-28.235617 -49.498897

sp 222 [Obama rufiventris urubici]
-28.038956 -49.614243

sp 223 [Obama semicristiana urubici]
-28.161997 -49.627107

sp 224 [Obama tigrecristiana]
-28.038432 -49.613820

sp 225 [Obama tigrecristiana cinza]
-28.038432 -49.613820

sp 226 [Obama curinga]
-28.235617 -49.498897
-27.840735 -48.924866

sp 227 [Paraba metzi urubici]
-28.162100 -49.626466

sp 228 [Paraba tarjas transversais]
-28.275805 -49.549801

sp 229 [Pasipha 119 urubici]
-28.038422 -49.613814

sp 230 [Pasipha bordos claros urubici]
-28.161958 -49.627265

sp 231 [Pasipha burmeisteri urubici]
-28.040082 -49.615061

sp 232 [Pasipha pinima urubici]
-27.05386 -49.08606
-28.161997 -49.627107

sp 233 [Pasipha tapetilla urubici]
-27.960810 -49.483000

sp 234 [Pequena preta urubici]
-28.14187 -49.63534

sp 235 [cryptolineata urubici]
-28.157942 -49.638496

sp 236 [preta avermelhada urubici]
-27.961773 -49.483299

sp 237 [Pretinha fina urubici]
-28.038610 -49.613914

sp 238 [Pseudocephaloflexa]
-28.039749 -49.614906

sp 239 [Xerapoa punkarra]
-28.039273 -49.614560

sp 240 [Xerapoa urubici]
-28.040082 -49.615061

sp 241 [amarela 4 estrias]
-27.86 -48.91

sp 242 [catharina v1]
-27.840735 -48.924866

sp 243 [catharina v2]
-27.84 -48.92

sp 244 [Choeradoplana AC-bolinha spn]
-27.94 -48.79

sp 245 [Choeradoplana catuoides]
-27.94 -48.79

sp 246 [Choeradoplana tristriata]
-27.94 -48.79

sp 247 [ferussaci linha amarella]
-27.840735 -48.924866

sp 248 [Geoplaninae cremea]
-27.94 -48.79

sp 249 [Geoplaninae marrom-preta]
-27.84 -48.92

sp 250 [Geoplaninae tabuleiro 1]
-27.94 -48.79

sp 251 [Supramontana guarra]
-27.84 -48.92

sp 252 [Luteostriata esvaecida]
-27.840735 -48.924866

sp 253 [Notogynaphallia plumbea-tabuleiro]
-27.840735 -48.924866

sp 254 [Notogynaphallia sp n tabuleiro]
-27.840735 -48.924866

sp 255 [Obama cristiana]
-27.840735 -48.924866
-27.61727 -49.35075

sp 256 [Obama rufiventris-sensu-ihering]
-27.94 -48.79

sp 257 [Pasipha plana-tabuleiro]
-27.94 -48.79
-27.61727 -49.35075

sp 258 [preta-pequena-tabuleiro]
-27.94 -48.79

sp 259 [Winsoria tabuleiro sp n]
-27.840735 -48.924866

sp 260 [Cratera não tamoia]
-27.05386 -49.08606

sp 261 [Geoplaninae gema]
-27.05306 -49.08528

sp 262 [Ventre amarelo]
-27.05386 -49.08606

sp 263 [Choeradoplana marrom hilaire]
-25.469604 -48.813739

sp 264 [Geoplana chita3]
-25.469604 -48.813739

sp 265 [Geoplana suja sp n]
-25.469604 -48.813739

sp 266 [Obama não itatiayana nem ficki]
-25.71 -48.62

sp 267 [Geoplaninae não polyophthalma]
-25.469604 -48.813739

sp 268 [Geoplana atriangygina]
-23.453148 -46.634488

sp 269 [Cratera non-taxiarcha]
-23.423381 -45.083399

sp 270 [Paraba non-preta]
-23.500212 -46.702310

sp 271 [Paraba semiphocaica]
-22.73389 -44.61639

sp 272 [Pasipha semichimbeva]
-22.73389 -44.61639
